# Supplementary material for: Temperature seasonality in the North American continental interior during the Early Eocene Climatic Optimum
Source: Copernicus journal article supplement (doi:10.5194/cp-14-1391-2018), 2018-10-04
Supplement: Supplementary file 1 [file cp-14-1391-2018-supplement.zip]

Table S5. Climatic envelopes for modern plant taxa

| Taxa*                | MAT (°C) <sup>†</sup> | σ   | WMT (°C) <sup>†</sup> | σ   | CMT (°C) <sup>†</sup> | σ   |
|----------------------|-----------------------|-----|-----------------------|-----|-----------------------|-----|
| <i>Acer</i>          | 9.0                   | 2.5 | 22.2                  | 3.2 | -2.3                  | 4.0 |
| <i>Acrostichum</i>   | 24.8                  | 2.6 | 31.8                  | 2.5 | 17.0                  | 4.1 |
| <i>Ailanthus</i>     | 17.8                  | 4.5 | 29.7                  | 3.4 | 4.7                   | 7.7 |
| <i>Alchloanea</i>    | 21.7                  | 3.7 | 29.8                  | 3.4 | 13.0                  | 5.7 |
| <i>Allophylus</i>    | 23.4                  | 3.6 | 31.0                  | 3.6 | 15.3                  | 4.8 |
| <i>Alnus</i>         | 8.4                   | 2.6 | 21.0                  | 2.7 | -2.1                  | 3.9 |
| Apocynaceae          | 8.5                   | 4.5 | 27.6                  | 3.9 | -9.0                  | 7.1 |
| Arecaceae            | 22.3                  | 4.5 | 30.7                  | 3.8 | 13.6                  | 6.1 |
| <i>Astronium</i>     | 24.3                  | 2.4 | 31.8                  | 2.3 | 16.2                  | 3.7 |
| Bignoniaceae         | 21.2                  | 4.6 | 30.6                  | 3.9 | 11.3                  | 7.0 |
| <i>Caesalpinia</i>   | 23.1                  | 3.7 | 31.7                  | 3.5 | 13.9                  | 5.6 |
| <i>Cardiospermum</i> | 22.5                  | 3.5 | 31.7                  | 3.4 | 12.3                  | 5.6 |
| <i>Ceratophyllum</i> | 9.8                   | 3.1 | 22.6                  | 3.1 | -1.1                  | 4.0 |
| <i>Cladastris</i>    | 15.0                  | 5.0 | 29.6                  | 3.4 | 0.0                   | 7.8 |
| <i>Cnemidaria</i>    | 22.3                  | 3.3 | 28.7                  | 3.5 | 16.1                  | 3.5 |
| Cycadaceae           | 25.3                  | 2.8 | 33.5                  | 2.6 | 15.2                  | 4.3 |
| <i>Dalbergia</i>     | 23.2                  | 3.5 | 31.4                  | 3.1 | 14.4                  | 5.6 |
| <i>Dendropanax</i>   | 21.4                  | 4.0 | 29.5                  | 3.9 | 13.0                  | 5.7 |
| <i>Dipteronia</i>    | 13.3                  | 3.1 | 28.3                  | 2.9 | -2.7                  | 5.3 |
| Malvaceae            | 20.7                  | 3.4 | 29.6                  | 3.6 | 10.2                  | 5.1 |
| <i>Elaeocarpus</i>   | 16.7                  | 5.3 | 26.0                  | 4.4 | 6.8                   | 6.2 |
| <i>Equisetum</i>     | 7.7                   | 3.5 | 20.6                  | 3.3 | -3.4                  | 5.3 |
| <i>Fraxinus</i>      | 9.2                   | 2.0 | 21.5                  | 3.1 | -0.9                  | 3.0 |
| <i>Glyptostrobus</i> | 20.4                  | 2.2 | 31.9                  | 1.7 | 8.0                   | 4.2 |
| <i>Gymnocladus</i>   | 12.8                  | 3.0 | 31.5                  | 2.1 | -6.1                  | 4.5 |
| <i>Hovenia</i>       | 15.7                  | 3.0 | 30.4                  | 2.4 | 0.7                   | 4.1 |
| <i>Hydrangea</i>     | 14.6                  | 4.8 | 26.9                  | 4.4 | 2.1                   | 8.0 |
| Juglandaceae         | 12.3                  | 4.1 | 26.8                  | 3.8 | -0.7                  | 6.0 |
| Lauraceae            | 18.8                  | 4.6 | 28.3                  | 3.8 | 8.8                   | 6.4 |
| <i>Lindera</i>       | 15.0                  | 4.6 | 28.8                  | 3.4 | 0.8                   | 7.3 |
| <i>Lygodium</i>      | 22.8                  | 4.4 | 31.5                  | 3.1 | 13.5                  | 7.2 |
| Magnoliaceae         | 16.5                  | 5.2 | 28.7                  | 3.7 | 3.7                   | 9.2 |
| Menispermaceae       | 21.2                  | 4.8 | 30.5                  | 3.9 | 10.8                  | 7.3 |
| <i>Nymphaea</i>      | 10.4                  | 5.9 | 22.5                  | 4.8 | -0.2                  | 7.0 |
| <i>Philodendron</i>  | 22.9                  | 3.6 | 29.8                  | 3.4 | 16.1                  | 4.9 |
| <i>Pinus</i>         | 9.4                   | 4.0 | 23.4                  | 4.4 | -2.2                  | 5.2 |
| <i>Platanus</i>      | 13.5                  | 3.7 | 28.9                  | 3.5 | -0.4                  | 6.0 |
| <i>Platycarya</i>    | 16.1                  | 3.1 | 28.9                  | 4.4 | 2.7                   | 4.1 |
| Polypodiaceae        | 11.7                  | 5.8 | 22.9                  | 4.5 | 1.7                   | 7.3 |
| <i>Populus</i>       | 8.1                   | 3.0 | 21.8                  | 3.3 | -3.4                  | 4.4 |
| Proteaceae           | 18.0                  | 4.8 | 29.8                  | 4.9 | 6.5                   | 4.8 |
| <i>Quercus</i>       | 11.2                  | 3.2 | 25.2                  | 5.0 | 0.1                   | 3.3 |
| <i>Rhus</i>          | 14.1                  | 4.4 | 29.8                  | 3.5 | -0.6                  | 7.2 |
| Rutaceae             | 17.9                  | 4.5 | 29.3                  | 4.1 | 6.9                   | 5.9 |
| <i>Salvinia</i>      | 21.6                  | 5.7 | 31.7                  | 2.7 | 11.4                  | 9.6 |
| <i>Schoepfia</i>     | 21.6                  | 3.7 | 30.5                  | 3.5 | 12.2                  | 6.2 |
| <i>Smilax</i>        | 17.2                  | 4.6 | 28.5                  | 3.7 | 6.1                   | 6.4 |
| <i>Stillingia</i>    | 19.1                  | 3.0 | 33.8                  | 5.2 | 5.6                   | 5.1 |
| <i>Syzygium</i>      | 21.2                  | 4.6 | 29.7                  | 4.1 | 11.5                  | 6.0 |
| Taxodiaceae          | 15.1                  | 4.5 | 28.1                  | 5.2 | 2.6                   | 4.6 |
| Thelypteridaceae     | 10.0                  | 6.8 | 22.5                  | 5.2 | -1.3                  | 8.7 |
| <i>Triumfetta</i>    | 23.7                  | 3.7 | 32.8                  | 4.4 | 13.1                  | 4.9 |
| <i>Ulmus</i>         | 8.9                   | 2.5 | 21.4                  | 3.2 | -1.4                  | 3.3 |
| <i>Woodwardia</i>    | 14.6                  | 4.0 | 28.1                  | 3.9 | 1.6                   | 6.3 |
| Zingiberaceae        | 21.5                  | 4.5 | 29.5                  | 3.6 | 12.9                  | 7.1 |

\* Analyzed modern taxa represent nearest living relative of fossil taxa from studied sites (summarized in Table S4).

† Mean values and standard deviations derived from modern global distributions (GBIF, 2016) cross-plotted with high-resolution climatic maps (Hijmans et al., 2005).
