# Supplementary material for: Temperature seasonality in the North American continental interior during the Early Eocene Climatic Optimum
Source: Copernicus journal article supplement (doi:10.5194/cp-14-1391-2018), 2018-10-04
Supplement: Supplementary file 2 [file cp-14-1391-2018-supplement.zip]

Table S4. Floral lists and nearest living relative data

|                                            | Taxa*                              | Updated affinity                                                                       | Nearest living relative       | Source |
|--------------------------------------------|------------------------------------|----------------------------------------------------------------------------------------|-------------------------------|--------|
| LATHAM                                     | <i>Meliosma longifolia</i>         | <i>Dyrana flexuosa</i>                                                                 | Platanaceae                   | 1,9    |
|                                            | <i>Cnemidaria magna</i>            |                                                                                        | <i>Cnemidaria grandifolia</i> | 1      |
|                                            | <i>Platycarya americana</i>        |                                                                                        | <i>Platycarya strobilacea</i> | 1      |
|                                            | <i>Salvinia preauriculata</i>      |                                                                                        | <i>Salvinia auriculata</i>    | 1,3    |
|                                            | <i>Lygodium kaulfussi</i>          |                                                                                        | <i>Lygodium palmatum</i>      | 1,4    |
|                                            | <i>Sabalites</i> sp.               |                                                                                        | Arecaceae                     | 1      |
|                                            | <i>Zingiberopsis isonervosa</i>    |                                                                                        | Zingiberaceae                 | 1,5    |
|                                            | Apocynaceae sp.                    |                                                                                        | Apocynaceae                   | 1,2    |
|                                            | <i>Alnus</i> sp.                   |                                                                                        | <i>Alnus</i> sp.              | 1,2    |
|                                            | <i>Stillingia casca</i>            |                                                                                        | <i>Stillingia</i> sp.         | 1,5    |
|                                            | Lauraceae sp.                      |                                                                                        | Lauraceae                     | 1      |
|                                            | <i>Dombeya novi-mundi</i>          | Malvaceae                                                                              | Malvaceae                     | 1,5    |
|                                            | <i>Averrhoites affinis</i>         |                                                                                        | Oxalidaceae                   | 1,5    |
|                                            | <i>Populus wyomingiana</i>         |                                                                                        | <i>Populus</i> sp.            | 1,3,6  |
| SOURDOUGH                                  | <i>Platycarya americana</i>        |                                                                                        | <i>Platycarya strobilacea</i> | 1,5    |
|                                            | <i>Alnus</i> sp.                   |                                                                                        | <i>Alnus</i> sp.              | 1,2    |
|                                            | Apocynaceae sp.                    |                                                                                        | Apocynaceae                   | 1,2    |
|                                            | Lauraceae sp.                      |                                                                                        | Lauraceae                     | 1      |
|                                            | <i>Hovenia oregonensis</i>         |                                                                                        | <i>Hovenia</i> sp.            | 1,7    |
|                                            | <i>Dombeya novi-mundi</i>          | Malvaceae                                                                              | Malvaceae                     | 1,5    |
|                                            | <i>Populus wyomingiana</i>         |                                                                                        | <i>Populus</i> sp.            | 1,3,6  |
|                                            | <i>Allophylus flexifolia</i>       |                                                                                        | <i>Allophylus racemosus</i>   | 1      |
|                                            | <i>Cinnamomophyllum</i> sp.        | Lauraceae                                                                              | Lauraceae                     | 1,9    |
|                                            | <i>Equisetum</i> sp.               |                                                                                        | <i>Equisetum</i> sp.          | 1      |
|                                            | <i>Woodwardia grvida</i>           |                                                                                        | <i>Woodwardia fimbriata</i>   | 1,5    |
|                                            | <i>Cnemidaria magna</i>            |                                                                                        | <i>Cnemidaria grandifolia</i> | 1,5    |
|                                            | <i>Allantodiopsis erosa</i>        |                                                                                        | Polypodiaceae                 | 1,2    |
|                                            | <i>Salvinia preauriculata</i>      |                                                                                        | <i>Salvinia auriculata</i>    | 1,3    |
|                                            | <i>Lygodium kaulfussi</i>          |                                                                                        | <i>Lygodium palmatum</i>      | 1,4    |
|                                            | <i>Thelypteris iddingsi</i>        |                                                                                        | <i>Thelypteris kunthii</i>    | 1,6    |
|                                            | <i>Glyptostrobus europaeus</i>     |                                                                                        | <i>Glyptostrobus pensilis</i> | 1,4    |
|                                            | <i>Philodendron</i> sp.            |                                                                                        | <i>Philodendron</i> sp.       | 1      |
|                                            | <i>Sabalites</i> sp.               |                                                                                        | Arecaceae                     | 1      |
|                                            | <i>Zingiberopsis isonervosa</i>    |                                                                                        | Zingiberaceae                 | 1,5    |
|                                            | <i>Sparganium stygium</i>          | <i>Platananthus</i> sp.                                                                | Platanaceae                   | 1,4,9  |
|                                            | <i>Dendropanax latens</i>          |                                                                                        | <i>Dendropanax</i> sp.        | 1,6    |
|                                            | <i>Elaeocarpus sloanea</i>         |                                                                                        | <i>Elaeocarpus</i> sp.        | 1,2    |
|                                            | <i>Stillingia casca</i>            |                                                                                        | <i>Stillingia</i> sp.         | 1,5    |
|                                            | Fagaceae sp.                       |                                                                                        | Fagaceae                      | 1      |
|                                            | Magnoliaceae sp.                   |                                                                                        | Magnoliaceae                  | 1      |
|                                            | <i>Palaeosinomenium venablesii</i> |                                                                                        | Menispermaceae                | 1,7    |
|                                            | <i>Atriaecarpum clarnense</i>      |                                                                                        | Menispermaceae                | 1,7    |
|                                            | <i>Syzygioides americana</i>       |                                                                                        | <i>Syzygium</i> sp.           | 1,2,7  |
|                                            | Nymphaeaceae sp.                   |                                                                                        | Nymphaeaceae                  | 1      |
|                                            | <i>Schoepfia republicensis</i>     |                                                                                        | <i>Schoepfia</i> sp.          | 1,8    |
|                                            | <i>Macginitiea gracilis</i>        |                                                                                        | <i>Platanus</i> sp.           | 1,8    |
|                                            | <i>Chaetoptelea microphylla</i>    | <i>Ulmites microphylla</i>                                                             | <i>Ulmus</i> sp.              | 1,3,9  |
|                                            | <i>Averrhoites affinis</i>         |                                                                                        | Oxalidaceae                   | 1,5    |
| <b>Sources</b>                             |                                    |                                                                                        |                               |        |
| <sup>1</sup> Wilf (1998, 2000)             |                                    | * Taxa listed in order of abundance, as per original floral lists of Wilf (1998, 2000) |                               |        |
| <sup>2</sup> Wing (1998)                   |                                    |                                                                                        |                               |        |
| <sup>3</sup> Berry (1916)                  |                                    |                                                                                        |                               |        |
| <sup>4</sup> Heer (1859)                   |                                    |                                                                                        |                               |        |
| <sup>5</sup> Hickey (1977, 1980)           |                                    |                                                                                        |                               |        |
| <sup>6</sup> MacGinitie (1969)             |                                    |                                                                                        |                               |        |
| <sup>7</sup> Manchester and Dilcher (1982) |                                    |                                                                                        |                               |        |
| <sup>8</sup> Wolfe and Wehr (1987)         |                                    |                                                                                        |                               |        |
| <sup>9</sup> Manchester (2014)             |                                    |                                                                                        |                               |        |

Table S4. (cont'd)

|                                                                    | Taxa*                                    | Updated affinity | Nearest living relative          | Source |
|--------------------------------------------------------------------|------------------------------------------|------------------|----------------------------------|--------|
| N<br>I<br>L<br>A<br>N<br>D<br>T<br>O<br>N<br>G<br>U<br>E           | <i>Platycarya castaneopsis</i>           | Malvaceae        | <i>Platycarya</i> sp.            | 1,2    |
|                                                                    | <i>Dombeya novi-mundi</i>                |                  | Malvaceae                        | 1,5    |
|                                                                    | <i>Averrhoites affinis</i>               |                  | Oxalidaceae                      | 1,5    |
|                                                                    | <i>Equisetum</i> sp.                     |                  | <i>Equisetum giganteum</i>       | 1      |
|                                                                    | <i>Acrostichum hesperium</i>             |                  | <i>Acrostichum aureum</i>        | 1,6    |
|                                                                    | <i>Salvinia preauriculata</i>            |                  | <i>Salvinia auriculata</i>       | 1,3    |
|                                                                    | <i>Lygodium kaulfussi</i>                |                  | <i>Lygodium palmatum</i>         | 1,4,6  |
|                                                                    | <i>Thelypteris iddingsi</i>              |                  | <i>Thelypteris kunthii</i>       | 1,6    |
|                                                                    | <i>Cycadaceae</i> sp.                    |                  | Cycadaceae                       | 1      |
|                                                                    | <i>Sabalites</i> sp.                     |                  | Arecaceae                        | 1      |
|                                                                    | <i>Zingiberopsis isonervosa</i>          |                  | Zingiberaceae                    | 1,5    |
|                                                                    | <i>Dendropanax latens</i>                |                  | <i>Dendropanax</i> sp.           | 1,6    |
|                                                                    | <i>Alnus</i> sp.                         |                  | <i>Alnus</i> sp.                 | 1,2    |
|                                                                    | <i>Leguminosae gleditsia</i>             |                  | <i>Dalbergia hupeana</i>         | 1      |
|                                                                    | <i>Anamirta milleri</i>                  |                  | <i>Anamirta cocculus</i>         | 1,8    |
|                                                                    | <i>Schoepfia republicensis</i>           |                  | <i>Schoepfia</i> sp.             | 1,8    |
|                                                                    | <i>Proteaciphyllum minutum</i>           |                  | Proteaceae                       | 1,6    |
|                                                                    | <i>Populus wyomingiana</i>               |                  | <i>Populus</i> sp.               | 1,3,6  |
| L<br>I<br>T<br>T<br>L<br>E<br>M<br>O<br>U<br>N<br>T<br>A<br>I<br>N | <i>Parvileguminophyllum coloradensis</i> | Cyclocarya sp.   | Fabaceae                         | 1      |
|                                                                    | <i>Lindera varifolia</i>                 |                  | <i>Lindera obtusifolia</i>       | 1,6    |
|                                                                    | <i>Rhus nigricans</i>                    |                  | <i>Rhus typhina</i>              | 1,6    |
|                                                                    | <i>Equisetum</i> sp.                     |                  | <i>Equisetum giganteum</i>       | 1      |
|                                                                    | <i>Allantodiopsis erosa</i>              |                  | Polypodiaceae                    | 1,2    |
|                                                                    | <i>Acrostichum hesperium</i>             |                  | <i>Acrostichum aureum</i>        | 1,6    |
|                                                                    | <i>Pinus</i> sp.                         |                  | <i>Pinus</i> sp.                 | 1      |
|                                                                    | <i>Pinus florissanti</i>                 |                  | <i>Pinus ponderosa</i>           | 1      |
|                                                                    | <i>Taxodiaceae</i> sp.                   |                  | Taxodiaceae                      | 1      |
|                                                                    | <i>Sabalites</i> sp.                     |                  | Arecaceae                        | 1      |
|                                                                    | <i>Smilacaceae smilax</i>                |                  | <i>Smilax herbacea</i>           | 1      |
|                                                                    | <i>Acer</i> sp.                          |                  | <i>Acer</i> sp.                  | 1      |
|                                                                    | <i>Dipteronia</i> sp.                    |                  | <i>Dipteronia</i> sp.            | 1      |
|                                                                    | <i>Alnus</i> sp.                         |                  | <i>Alnus</i> sp.                 | 1,2    |
|                                                                    | <i>Bignoniaceae</i> sp.                  |                  | Bignoniaceae                     | 1      |
|                                                                    | <i>Calycites ardtunensis</i>             |                  | Asteraceae                       | 1      |
|                                                                    | <i>Ceratophyllum muricatum</i>           |                  | <i>Ceratophyllum muricatum</i>   | 1,3    |
|                                                                    | <i>Elaeocarpus sloanea</i>               |                  | <i>Elaeocarpus</i> sp.           | 1,2    |
|                                                                    | <i>Euphorbiaceae alchloanea</i>          |                  | <i>Alchloanea</i> sp.            | 1      |
|                                                                    | <i>Quercus</i> sp.                       |                  | <i>Quercus polymorpha</i>        | 1,5    |
|                                                                    | <i>Acer lesquereuxi</i>                  |                  | <i>Acer pictum</i>               | 1      |
|                                                                    | <i>Hydrangea</i> sp.                     |                  | <i>Hydrangea</i> sp.             | 1      |
|                                                                    | <i>Palaeocarya clarnensis</i>            |                  | Juglandaceae                     | 1,7    |
|                                                                    | <i>Pterocarya macginittii</i>            |                  | Juglandaceae                     | 1,7,9  |
|                                                                    | <i>Juglandaceae</i> sp.                  |                  | Juglandaceae                     | 1      |
|                                                                    | <i>Caesalpinia flumen-viridensis</i>     |                  | <i>Caesalpinia</i> sp.           | 1      |
|                                                                    | <i>Cladrastris</i> sp.                   |                  | <i>Cladrastris kentukea</i>      | 1      |
|                                                                    | <i>Gymnocladus hesperia</i>              |                  | <i>Gymnocladus dioicus</i>       | 1,6    |
|                                                                    | <i>Leguminosites lesquereuxiana</i>      |                  | <i>Dalbergia hupeeana</i>        | 1      |
|                                                                    | <i>Triumfetta ovata</i>                  |                  | <i>Triumfetta</i> sp.            | 1,6    |
|                                                                    | <i>Menispermaceae abuta</i>              |                  | Menispermaceae                   | 1      |
|                                                                    | <i>Syzygioides americana</i>             |                  | <i>Syzygium</i> sp.              | 1,7    |
|                                                                    | <i>Macginitiea wyomingensis</i>          |                  | <i>Platanus</i> sp.              | 1,7    |
|                                                                    | <i>Platanus raynoldsi</i>                |                  | <i>Platanus</i> sp.              | 1,9    |
|                                                                    | <i>Proteaciphyllum minutum</i>           |                  | Proteaceae                       | 1,6    |
|                                                                    | <i>Populus cinnamomoides</i>             |                  | <i>Populus angustifolia</i>      | 1,6    |
|                                                                    | <i>Allophylus flexifolia</i>             |                  | <i>Allophylus racemosus</i>      | 1,6    |
|                                                                    | <i>Cardiospermum coloradensis</i>        |                  | <i>Cardiospermum microcarpum</i> | 1,6    |
|                                                                    | <i>Koelreuteria viridifluminis</i>       |                  | Rutaceae                         | 1,9    |
|                                                                    | <i>Sapindales</i> sp.                    |                  | <i>Sapindales</i> sp.            | 1      |
|                                                                    | <i>Ailanthus lesquereuxi</i>             |                  | <i>Ailanthus altissima</i>       | 1      |
|                                                                    | <i>Cedrelospermum nervosum</i>           |                  | <i>Ulmus</i> sp.                 | 1,7    |
|                                                                    | <i>Astronium truncatum</i>               |                  | <i>Astronium graveolens</i>      | 1,6    |
|                                                                    | <i>Averrhoites affinis</i>               |                  | Oxalidaceae                      | 1,3,5  |
|                                                                    | <i>Fraxinus</i> sp.                      |                  | <i>Fraxinus</i> sp.              | 1      |
