# Supplementary material for: Temperature seasonality in the North American continental interior during the Early Eocene Climatic Optimum
Source: Copernicus journal article supplement (doi:10.5194/cp-14-1391-2018), 2018-10-04
Supplement: Supplementary file 3 [file cp-14-1391-2018-supplement.zip]

Archive with 9 entries (8 files):
- CP_supplement/
- CP_supplement/TableS5floraltemps.pdf
- CP_supplement/TableS6matestimates.pdf
- CP_supplement/TableS4floral.pdf
- CP_supplement/TableS2clumped.pdf
- CP_supplement/TableS7climate.pdf
- CP_supplement/TableS3clumpedfull.xlsx
- CP_supplement/TableS1paleosols.pdf
- cp-14-1391-2018-supplement-title-page.pdf
