# Supplementary material for: Temperature seasonality in the North American continental interior during the Early Eocene Climatic Optimum
Source: Copernicus journal article supplement (doi:10.5194/cp-14-1391-2018), 2018-10-04
Supplement: Supplementary file 3 [file cp-14-1391-2018-supplement.zip › cp-14-1391-2018-supplement-title-page.pdf]

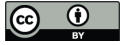

## *Supplement of*

# **Temperature seasonality in the North American continental interior during the Early Eocene Climatic Optimum**

**Ethan G. Hyland et al.**

*Correspondence to:* Ethan G. Hyland (ehyland@ncsu.edu)

- cp-14-1391-2018-supplement-title-page.pdf
- CP\_supplement
  - TableS1paleosols.pdf
  - TableS2clumped.pdf
  - TableS3clumpedfull.xlsx
  - TableS4floral.pdf
  - TableS5floraltemps.pdf
  - TableS6matestimates.pdf
  - TableS7climate.pdf

The copyright of individual parts of the supplement might differ from the CC BY 4.0 License.
