# Supplementary material for: Temperature seasonality in the North American continental interior during the Early Eocene Climatic Optimum
Source: Copernicus journal article supplement (doi:10.5194/cp-14-1391-2018), 2018-10-04
Supplement: Supplementary file 3 [file cp-14-1391-2018-supplement.zip › CP_supplement/TableS1paleosols.pdf]

Table S1. Paleosol geochemistry data

| Sample | Soil type | Horizon | Height (m)* | wt%                            |      |                               |                  |                  |                  |                                |       |                   |      |                  | MAT (°C)† |
|--------|-----------|---------|-------------|--------------------------------|------|-------------------------------|------------------|------------------|------------------|--------------------------------|-------|-------------------|------|------------------|-----------|
|        |           |         |             | Fe <sub>2</sub> O <sub>3</sub> | MnO  | P <sub>2</sub> O <sub>5</sub> | SiO <sub>2</sub> | TiO <sub>2</sub> | ZrO <sub>2</sub> | Al <sub>2</sub> O <sub>3</sub> | CaO   | Na <sub>2</sub> O | MgO  | K <sub>2</sub> O |           |
| HB-99  | Alfisol   | Bt      | 6           | 4.17                           | 0.35 | 0.19                          | 51.56            | 0.60             | 0.02             | 11.60                          | 10.20 | 2.02              | 2.00 | 2.16             | 14.9      |
| HB-113 | Alfisol   | Bt      | 18          | 5.67                           | 0.15 | 0.26                          | 50.00            | 0.63             | 0.05             | 13.45                          | 6.78  | 1.53              | 2.58 | 2.69             | 15.0      |
| HB-13  | Alfisol   | Bt      | 24.5        | 1.75                           | 0.14 | 0.14                          | 62.07            | 0.45             | 0.03             | 8.70                           | 11.18 | 1.61              | 1.04 | 1.74             | 17.1      |
| HB-133 | Alfisol   | Bt      | 41          | 2.55                           | 0.03 | 0.08                          | 60.38            | 0.57             | 0.04             | 14.69                          | 5.61  | 2.15              | 2.34 | 2.96             | 14.3      |
| HB-55  | Alfisol   | Bt      | 66.5        | 5.44                           | 0.17 | 0.17                          | 51.00            | 0.63             | 0.02             | 13.24                          | 6.88  | 1.71              | 2.71 | 2.36             | 13.5      |
| HB-59  | Alfisol   | Bt      | 72.5        | 6.27                           | 0.12 | 0.29                          | 49.22            | 0.65             | 0.02             | 14.59                          | 7.28  | 1.22              | 2.65 | 2.46             | 13.7      |
| HB-70  | Alfisol   | Bt      | 83          | 4.53                           | 0.15 | 0.16                          | 55.20            | 0.52             | 0.03             | 10.83                          | 8.15  | 1.86              | 2.10 | 2.19             | 16.3      |
| HB-78  | Alfisol   | Bt      | 93          | 3.13                           | 0.29 | 0.38                          | 49.18            | 0.37             | 0.02             | 9.43                           | 13.78 | 1.64              | 1.90 | 2.01             | 17.6      |
| HB-86  | Alfisol   | Bt      | 99          | 5.24                           | 0.13 | 0.11                          | 51.00            | 0.56             | 0.04             | 11.85                          | 6.37  | 1.77              | 4.23 | 2.53             | 14.9      |
| HB-182 | Alfisol   | Bt      | 107         | 6.62                           | 0.11 | 0.15                          | 50.57            | 0.62             | 0.03             | 14.00                          | 5.08  | 2.04              | 2.38 | 2.53             | 14.2      |

\* Height refers to stratigraphic height in HB sections, "peak EECO" defined as ~40 - 90m (Figure 4; Hyland and Sheldon, 2013; Hyland et al., 2017).

† MAT presented is "high" estimates from PPM<sub>1,0</sub> as described in Stinchcomb et al. (2016) and Section 4.1
