# Supplementary material for: Temperature seasonality in the North American continental interior during the Early Eocene Climatic Optimum
Source: Copernicus journal article supplement (doi:10.5194/cp-14-1391-2018), 2018-10-04
Supplement: Supplementary file 3 [file cp-14-1391-2018-supplement.zip › CP_supplement/TableS2clumped.pdf]

Table S2. Clumped isotope data

| Sample | Height (m)* | $\delta^{13}\text{C}$ (‰)** | $\delta^{18}\text{O}$ (‰)** | $\Delta_{47}$ (‰) | S.E. (‰) | $\Delta_{48}$ (‰) | Ave. $\Delta_{47}$ (‰) <sup>§</sup> | T (°C) | $\delta^{18}\text{O}_{\text{ssw}}$ (‰) <sup>†</sup> |
|--------|-------------|-----------------------------|-----------------------------|-------------------|----------|-------------------|-------------------------------------|--------|-----------------------------------------------------|
| HB-109 | 5           | -9.81                       | -10.95                      | 0.627             | 0.010    | 0.45              | 0.628 ± 0.001                       | 19 ± 3 | -9.6                                                |
|        |             | -9.69                       | -10.84                      | 0.629             | 0.009    | -0.01             |                                     |        |                                                     |
|        |             | -9.54                       | -10.64                      | 0.627             | 0.006    | 0.41              |                                     |        |                                                     |
| HB-18  | 25          | -6.36                       | -5.33                       | 0.630             | 0.011    | 0.58              | 0.627 ± 0.001                       | 19 ± 3 | -3.9                                                |
|        |             | -6.59                       | -5.35                       | 0.625             | 0.009    | 0.24              |                                     |        |                                                     |
|        |             | -6.57                       | -5.22                       | 0.627             | 0.009    | 0.02              |                                     |        |                                                     |
| HB-128 | 35          | -5.54                       | -5.03                       | 0.608             | 0.010    | 0.52              | 0.594 ± 0.010                       | 29 ± 3 | -1.4                                                |
|        |             | -5.53                       | -4.93                       | 0.606             | 0.008    | 0.01              |                                     |        |                                                     |
|        |             | -5.51                       | -4.91                       | 0.570             | 0.009    | 0.24              |                                     |        |                                                     |
| HB-129 | 45          | -6.20                       | -4.72                       | 0.624             | 0.009    | 0.56              | 0.611 ± 0.009                       | 24 ± 3 | -2.2                                                |
|        |             | -6.22                       | -4.72                       | 0.599             | 0.009    | 0.39              |                                     |        |                                                     |
| HB-30  | 50          | -5.90                       | -5.23                       | 0.583             | 0.010    | 0.30              | 0.582 ± 0.001                       | 34 ± 3 | -0.9                                                |
|        |             | -5.90                       | -5.21                       | 0.581             | 0.010    | 0.27              |                                     |        |                                                     |
| D-20   | 60          | -6.34                       | -4.72                       | 0.603             | 0.009    | 0.28              | 0.591 ± 0.008                       | 31 ± 3 | -0.9                                                |
|        |             | -6.34                       | -4.76                       | 0.570             | 0.007    | 0.22              |                                     |        |                                                     |
|        |             | -6.15                       | -4.60                       | 0.600             | 0.008    | 0.32              |                                     |        |                                                     |
| HB-47  | 65          | -5.83                       | -5.02                       | 0.594             | 0.010    | 0.33              | 0.607 ± 0.014                       | 25 ± 4 | -2.2                                                |
|        |             | -5.83                       | -5.03                       | 0.633             | 0.009    | 0.85              |                                     |        |                                                     |
|        |             | -5.65                       | -4.91                       | 0.634             | 0.010    | 0.26              |                                     |        |                                                     |
|        |             | -5.78                       | -4.83                       | 0.566             | 0.007    | 0.04              |                                     |        |                                                     |
| HB-162 | 80          | -8.23                       | -7.43                       | 0.603             | 0.008    | 0.44              | 0.605 ± 0.015                       | 26 ± 4 | -4.7                                                |
|        |             | -8.26                       | -7.48                       | 0.638             | 0.009    | -0.02             |                                     |        |                                                     |
|        |             | -8.29                       | -7.46                       | 0.575             | 0.010    | 0.32              |                                     |        |                                                     |
| HB-81  | 95          | -7.46                       | -11.83                      | 0.578             | 0.010    | 0.15              | 0.613 ± 0.011                       | 23 ± 3 | -9.6                                                |
|        |             | -7.48                       | -11.82                      | 0.609             | 0.008    | 0.44              |                                     |        |                                                     |
|        |             | -7.37                       | -11.78                      | 0.631             | 0.009    | 0.17              |                                     |        |                                                     |
|        |             | -7.44                       | -11.65                      | 0.634             | 0.009    | 0.19              |                                     |        |                                                     |
| HB-187 | 115         | -6.91                       | -7.95                       | 0.612             | 0.010    | 0.74              | 0.609 ± 0.011                       | 25 ± 3 | -5.4                                                |
|        |             | -6.81                       | -7.94                       | 0.631             | 0.008    | 0.04              |                                     |        |                                                     |
|        |             | -6.89                       | -7.88                       | 0.585             | 0.008    | 0.20              |                                     |        |                                                     |
| 129-A  |             | -5.60                       | -5.14                       | 0.629             | 0.009    | 0.13              | 0.621 ± 0.005                       | 21 ± 3 | -3.4                                                |
|        |             | -5.59                       | -5.25                       | 0.626             | 0.009    | 0.01              |                                     |        |                                                     |
|        |             | -5.67                       | -5.24                       | 0.609             | 0.009    | 0.03              |                                     |        |                                                     |
| 129-B  |             | -5.59                       | -4.84                       | 0.620             | 0.008    | -0.11             | 0.618 ± 0.001                       | 22 ± 3 | -2.8                                                |
|        |             | -5.62                       | -4.88                       | 0.617             | 0.009    | -0.02             |                                     |        |                                                     |
| 187-A  |             | -6.81                       | -8.91                       | 0.647             | 0.008    | 0.00              | 0.631 ± 0.009                       | 18 ± 3 | -7.8                                                |
|        |             | -6.79                       | -8.93                       | 0.609             | 0.007    | -0.07             |                                     |        |                                                     |
|        |             | -6.83                       | -8.78                       | 0.636             | 0.010    | 0.15              |                                     |        |                                                     |
| 187-B  |             | -6.71                       | -8.83                       | 0.619             | 0.007    | -0.10             | 0.624 ± 0.003                       | 20 ± 3 | -7.1                                                |
|        |             | -6.72                       | -8.59                       | 0.629             | 0.008    | 0.09              |                                     |        |                                                     |

| Standards | # runs | $\delta^{13}\text{C}$ (‰)* ‡ | $\delta^{18}\text{O}$ (‰)* ‡ | $\Delta_{47}$ (‰) ‡ | S.D. (‰) | S.E. (‰) | ARF statistics reported in Table S3<br>for 3 different analysis periods:<br>January - February 2015<br>March - April 2015<br>March 2017 |
|-----------|--------|------------------------------|------------------------------|---------------------|----------|----------|-----------------------------------------------------------------------------------------------------------------------------------------|
| ETH-2     | 15     | -10.16                       | -18.78                       | 0.213               | 0.029    | 0.007    |                                                                                                                                         |
| NBS-19    | 9      | 2.04                         | -2.16                        | 0.340               | 0.023    | 0.008    |                                                                                                                                         |
| C64       | 175    | -2.05                        | -15.69                       | 0.546               | 0.026    | 0.002    |                                                                                                                                         |
| COR       | 105    | -2.22                        | -4.50                        | 0.643               | 0.026    | 0.003    |                                                                                                                                         |

\* Height refers to stratigraphic height in HB sections, "peak EECO" defined as ~40 - 90m (Figure 4; Hyland and Sheldon, 2013; Hyland et al., 2017).

\*\* Measured versus Vienna Pee Dee Belemnite (VPDB).

† Calculated soil source water (ssw) composition versus Vienna standard mean ocean water (VSMOW), based on fractionation factor of Kim and O'Neil (1997).

§ Average of  $\Delta_{47}$  measurements with no acid fractionation correction applied (e.g., Kelson et al., 2017).

‡ Values represent average for standard analyses during combined sample analysis periods (January 2015 - March 2017).

T<sub>1</sub> Temperatures calculated using inorganic calcite calibration of Kelson et al. (2017), including uncertainty (analytical S.E.) for each sample except where lower than long term S.E. of standards (0.01; ±2°C).
