# Supplementary material for: Temperature seasonality in the North American continental interior during the Early Eocene Climatic Optimum
Source: Copernicus journal article supplement (doi:10.5194/cp-14-1391-2018), 2018-10-04
Supplement: Supplementary file 3 [file cp-14-1391-2018-supplement.zip › CP_supplement/TableS6matestimates.pdf]

Table S6. Mean annual temperature comparison from floral sites

|                 |                  | Physiognometric Methods |             |             | NLR Method  |
|-----------------|------------------|-------------------------|-------------|-------------|-------------|
| Site            | # of morphotypes | P                       | MAT1        | MAT2        | MAT3        |
| Latham          | 19               | 0.500                   | 16.4 (±3.9) | 14.8 (±4.8) | 16.0 (±1.5) |
| Sourdough       | 74               | 0.659                   | 21.3 (±2.3) | 18.0 (±4.8) | 16.4 (±1.8) |
| Niland Tongue   | 24               | 0.714                   | 23.0 (±3.1) | 19.2 (±4.8) | 18.2 (±2.1) |
| Little Mountain | 87               | 0.602                   | 19.6 (±2.3) | 16.9 (±4.8) | 15.2 (±1.5) |

MAT1 = Mean annual temperature estimates from Wilf (2000), error estimates based on Miller et al. (2006)  
MAT2 = Mean annual temperature estimates based on revised Peppe et al. (2011) equation  
MAT3 = Mean annual temperature estimates from this work (Fig. 3), with error estimates calculated as 2σ
